# Supplementary material
Source: publisher figshare collection journal article supplement (https://karger.figshare.com/ndownloader/files/25734920)
Supplement: Supplementary file 1 [file 25734920]

**Supplementary Table 1.** Bivariate correlations between measures

| Characteristics | 1. |  | 2. |  | 3. |  | 4. |  | 5. |  | 6. |  |
| --- | --- | --- | --- | --- | --- | --- | --- | --- | --- | --- | --- | --- |
| 1. Age | – |  |  |  |  |  |  |  |  |  |  |  |
| 1. Education | -.04 |  | – |  |  |  |  |  |  |  |  |  |
| 1. Self-rated health | -.03 |  | .31 | *** | – |  |  |  |  |  |  |  |
| 1. Empathy | -.06 |  | .12 |  | .00 |  | – |  |  |  |  |  |
| 1. Agreeableness | -.04 |  | -.02 |  | .02 |  | .33 | *** | – |  |  |  |
| 1. Neuroticism | -.10 |  | -.11 |  | -.26 | ** | -.07 |  | -.12 | * | – |  |
| Tension coping strategies |  |  |  |  |  |  |  |  |  |  |  |  |
| With anyone |  |  |  |  |  |  |  |  |  |  |  |  |
| 1. Avoidant | .16 | ** | .04 |  | .06 |  | -.08 |  | -.09 |  | .04 |  |
| 1. Constructive | -.15 | ** | .05 |  | .05 |  | .25 | *** | .04 |  | -.08 |  |
| 1. Destructive | -.15 |  | .01 |  | -.16 | *** | -.19 | ** | -.10 |  | .30 | *** |
| With close partners |  |  |  |  |  |  |  |  |  |  |  |  |
| 1. Avoidant | .08 |  | .01 |  | -.02 |  | -.12 | * | -.12 | * | .08 |  |
| 1. Constructive | -.13 | * | .04 |  | .11 |  | .27 | *** | .12 | * | -.09 |  |
| 1. Destructive | -.10 |  | -.03 |  | -.15 | ** | -.15 | ** | -.06 |  | .30 | *** |
| With not-close partners |  |  |  |  |  |  |  |  |  |  |  |  |
| 1. Avoidant | .18 | ** | .06 |  | .12 | * | -.02 |  | -.04 |  | -.01 |  |
| 1. Constructive | -.13 | * | .04 |  | -.02 |  | .17 | ** | -.03 |  | -.06 |  |
| 1. Destructive | -.16 | ** | .06 |  | -.12 | * | -.17 | ** | -.13 | * | .20 | ** |
| Interpersonal tensions |  |  |  |  |  |  |  |  |  |  |  |  |
| 1. With anyone | -.15 | * | .13 | * | -.12 | * | .05 |  | -.01 |  | .18 | ** |
| 1. With close partners | -.16 | * | .09 |  | -.10 |  | .01 |  | -.01 |  | .15 | ** |
| 1. With not-close partners | -.15 | * | .14 | * | -.13 | * | .02 |  | .04 |  | .14 | * |
| 1. Negative mood | .02 |  | -.05 |  | -.26 | *** | -.02 |  | -.05 |  | .35 | *** |
| 1. Positive mood | -.13 | * | .00 |  | .13 | * | .16 | ** | .29 | *** | -.16 | ** |
| 1. Female | .01 |  | .17 | ** | .03 |  | -.13 | * | -.26 | *** | .03 |  |
| 1. Married | -.21 | *** | .15 | ** | .02 |  | -.03 |  | -.12 | * | .13 | * |
| 1. Ethnic or racial minority | -.15 | ** | -.34 | *** | -.34 | *** | .02 |  | .02 |  | .15 | ** |

**Supplementary Table 1**– Continued. Bivariate correlations between measures

|  | 7. |  | 8. |  | 9. |  | 10. |  | 11. |  | 12. |  | 13. |  | 14. |  | 15. |  |
| --- | --- | --- | --- | --- | --- | --- | --- | --- | --- | --- | --- | --- | --- | --- | --- | --- | --- | --- |
| With anyone |  |  |  |  |  |  |  |  |  |  |  |  |  |  |  |  |  |  |
| 1. Avoidant | – |  |  |  |  |  |  |  |  |  |  |  |  |  |  |  |  |  |
| 1. Constructive | -.47 | *** | – |  |  |  |  |  |  |  |  |  |  |  |  |  |  |  |
| 1. Destructive | -.03 |  | -.02 |  | – |  |  |  |  |  |  |  |  |  |  |  |  |  |
| With close partners |  |  |  |  |  |  |  |  |  |  |  |  |  |  |  |  |  |  |
| 1. Avoidant | .81 | *** | -.40 | *** | .06 |  | – |  |  |  |  |  |  |  |  |  |  |  |
| 1. Constructive | -.29 | *** | .84 | *** | -.07 |  | -.38 | *** | – |  |  |  |  |  |  |  |  |  |
| 1. Destructive | .01 |  | -.05 |  | .89 | *** | .05 |  | -.05 |  | – |  |  |  |  |  |  |  |
| With not-close partners |  |  |  |  |  |  |  |  |  |  |  |  |  |  |  |  |  |  |
| 1. Avoidant | .86 | *** | -.38 | *** | -.10 |  | .40 | *** | -.12 | * | -.03 |  | – |  |  |  |  |  |
| 1. Constructive | -.50 | *** | .89 | *** | .03 |  | -.32 | *** | .50 | *** | -.03 |  | -.50 | *** | – |  |  |  |
| 1. Destructive | -.07 |  | .02 |  | .81 | *** | .05 |  | -.07 |  | .45 | *** | -.16 | ** | .09 |  | – |  |
| Interpersonal tensions |  |  |  |  |  |  |  |  |  |  |  |  |  |  |  |  |  |  |
| 1. With anyone | .03 |  | .04 |  | .22 | *** | .05 |  | .06 |  | .21 | *** | .00 |  | .02 |  | .15 | * |
| 1. With close partners | .04 |  | .01 |  | .24 | *** | .06 |  | .04 |  | .24 | *** | .01 |  | -.02 |  | .15 | ** |
| 1. With not-close partners | -.03 |  | .08 |  | .12 | * | -.01 |  | .08 |  | .09 |  | -.03 |  | .06 |  | .11 |  |
| 1. Negative mood | -.01 |  | -.01 |  | .16 | ** | .05 |  | -.03 |  | .12 | * | -.06 |  | .00 |  | .15 | ** |
| 1. Positive mood | -.03 |  | .18 | ** | -.04 |  | -.05 |  | .19 | ** | -.03 |  | .00 |  | .13 | * | -.03 |  |
| 1. Female | -.18 | ** | .08 |  | .12 | * | -.11 |  | -.02 |  | .04 |  | -.19 | ** | .15 | ** | .19 | ** |
| 1. Married | -.12 | * | .14 | * | .26 | *** | -.09 |  | .08 |  | .26 | *** | -.11 |  | .16 | ** | .18 | ** |
| 1. Ethnic or racial minority | -.23 | *** | .09 |  | .00 |  | -.14 | * | -.02 |  | .02 |  | -.24 | *** | .16 | ** | -.01 |  |

**Supplementary Table 1**– Continued. Bivariate correlations between measures

|  | 16. |  | 17. |  | 18. |  | 19. |  | 20. |  | 21. |  | 22. |  |
| --- | --- | --- | --- | --- | --- | --- | --- | --- | --- | --- | --- | --- | --- | --- |
| Interpersonal tensions |  |  |  |  |  |  |  |  |  |  |  |  |  |  |
| 1. With anyone | – |  |  |  |  |  |  |  |  |  |  |  |  |  |
| 1. With close partners | .90 | *** | – |  |  |  |  |  |  |  |  |  |  |  |
| 1. With not-close partners | .73 | *** | .42 | *** | – |  |  |  |  |  |  |  |  |  |
| 1. Negative mood | .40 | *** | .36 | *** | .28 | *** | – |  |  |  |  |  |  |  |
| 1. Positive mood | -.19 | ** | -.20 | ** | -.10 |  | -.34 | *** | – |  |  |  |  |  |
| 1. Female | -.10 |  | -.07 |  | -.10 |  | .05 |  | -.02 |  | – |  |  |  |
| 1. Married | .04 |  | .10 |  | -.12 | * | -.01 |  | .13 | * | .42 | *** | – |  |
| 1. Ethnic or racial minority | -.06 |  | -.06 |  | -.01 |  | .05 |  | .04 |  | .02 |  | -.01 |  |

**p* < .05. ***p* < .01. ****p* < .001.
